# Supplementary material for: A 25-Year Assessment of Aerosol Dynamics and Environmental Drivers in Iran’s Lakes and Wetlands
Source: Research Square preprint supplement (doi:10.21203/rs.3.rs-6778141/v1), 2025-07-14
Supplement: Supplementary file 1 [file a67436f0b461c1776bd58b5b.docx]

**Supplementary material**


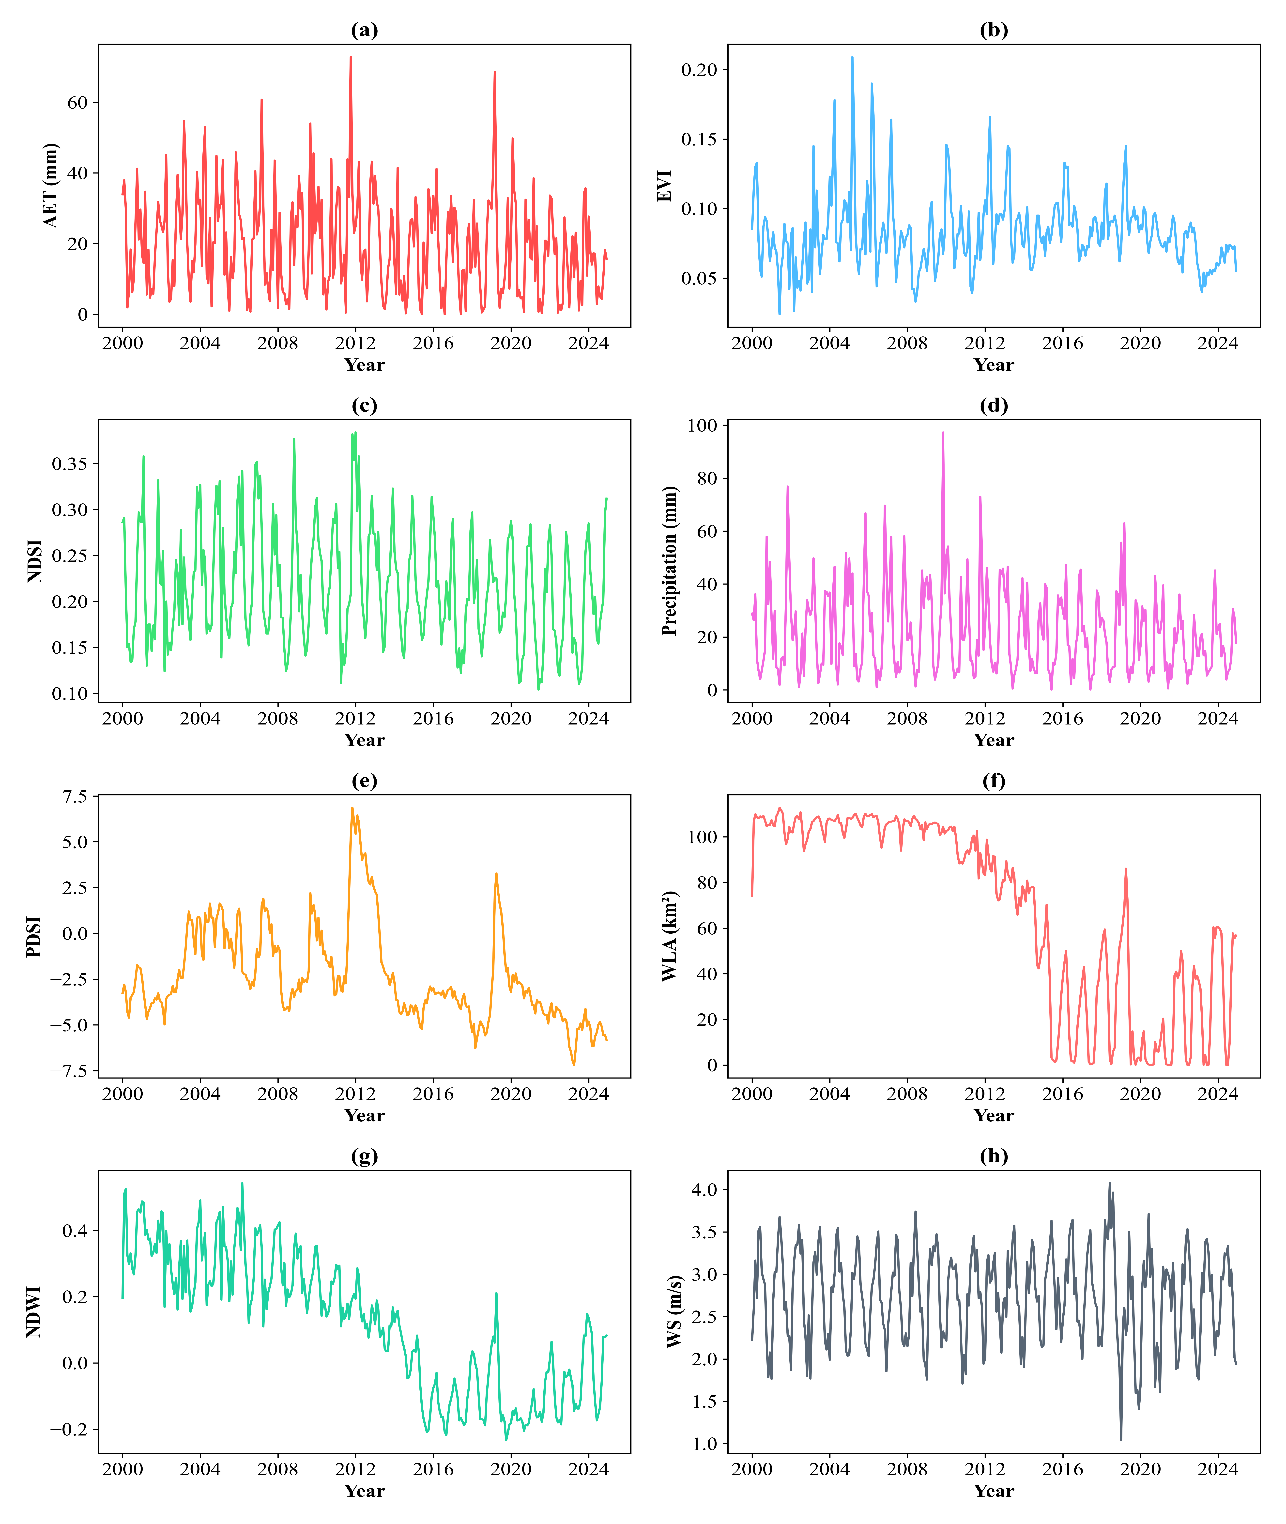


**Figure.S1. Monthly changes in AET (actual evapotranspiration), EVI (Enhanced vegetation index), NDSI (Normalized difference salinity index), precipitation (Pre), Palmer drought severity index (PDSI), WLA (wetland lake area), NDWI (Normalized difference water index), WS (wind speed) in Gomishan Wetland, Iran.**


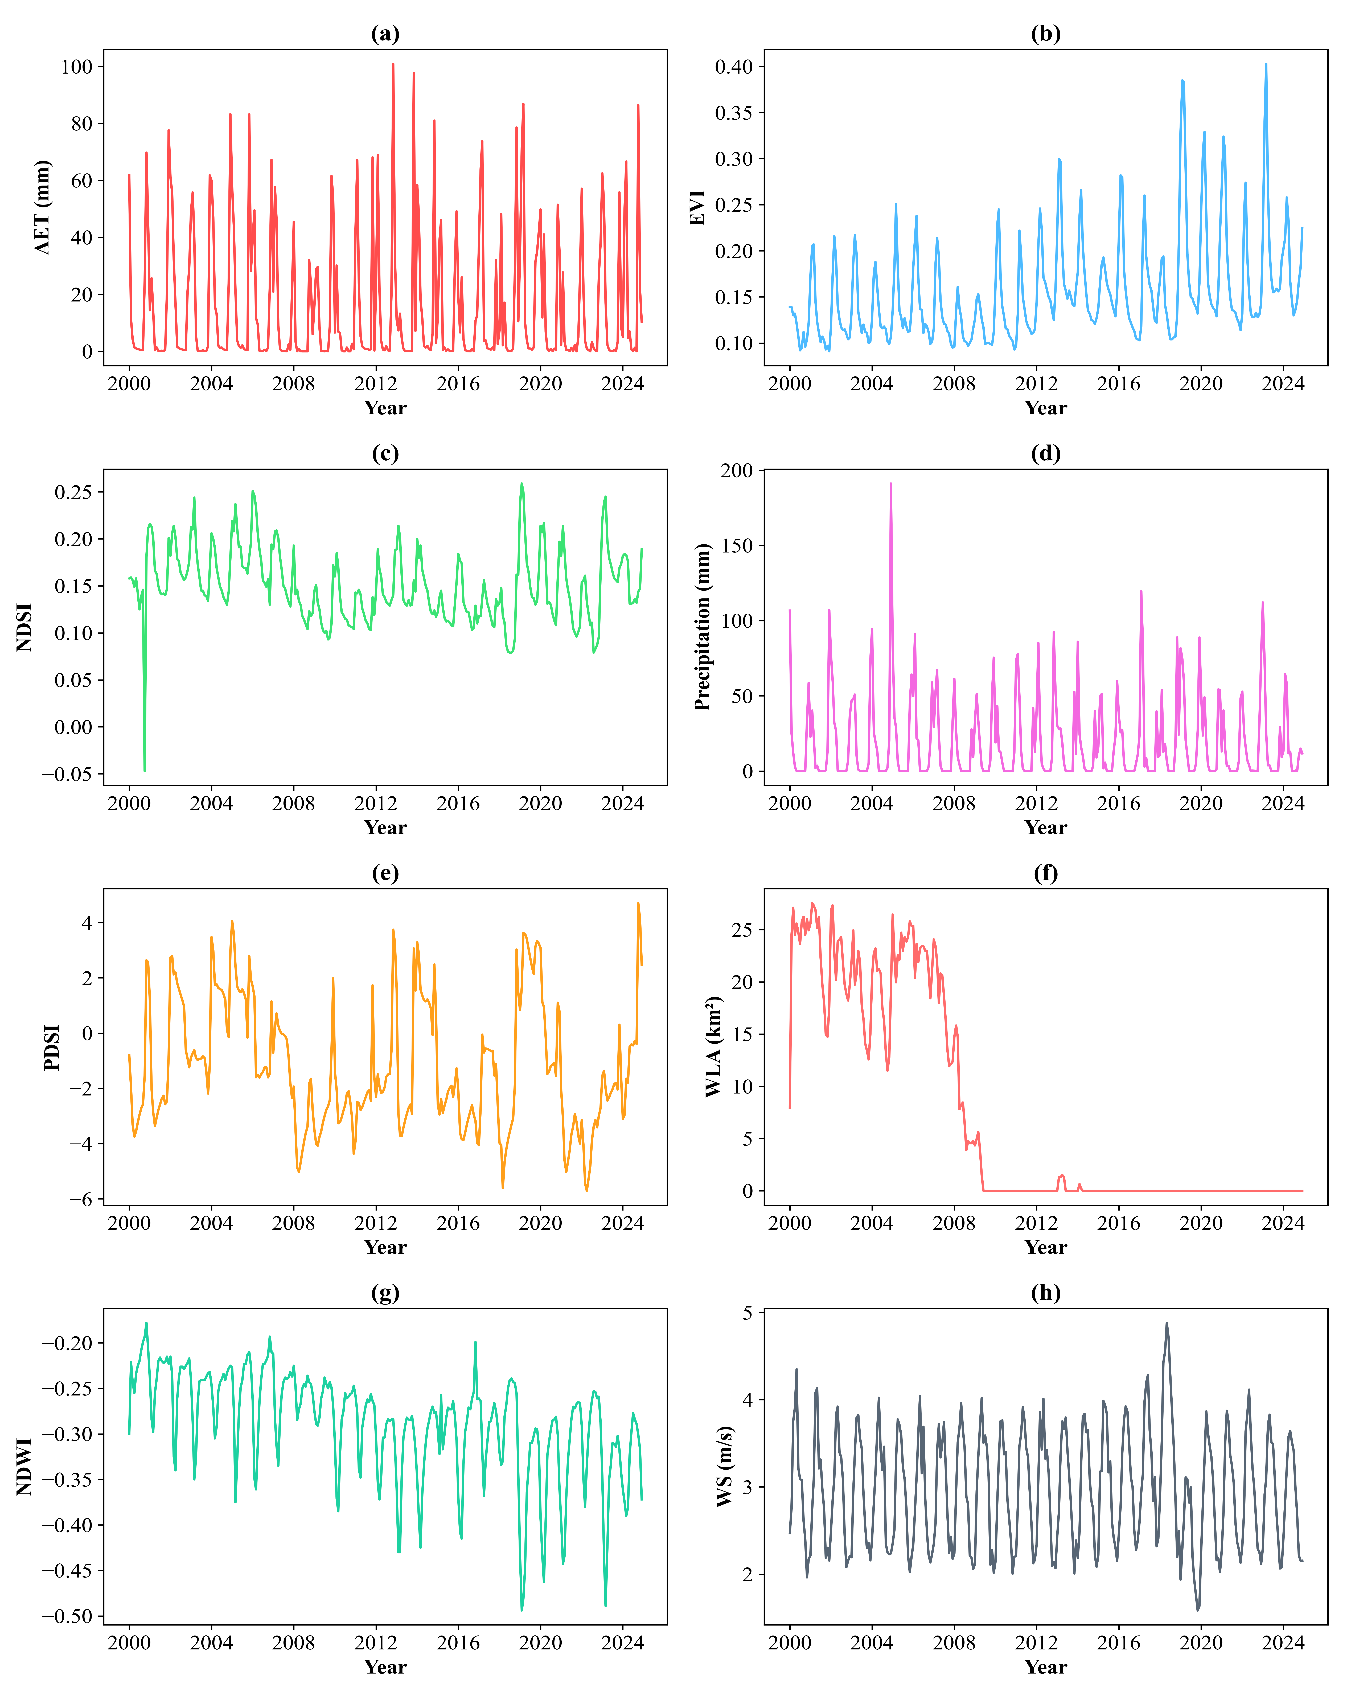


**Fig.S2. Monthly changes in AET (actual evapotranspiration), EVI (Enhanced vegetation index), NDSI (Normalized difference salinity index), precipitation (Pre), Palmer drought severity index (PDSI), WLA (wetland lake area), NDWI (Normalized difference water index), WS (wind speed) in Parishan Wetland, Iran.**


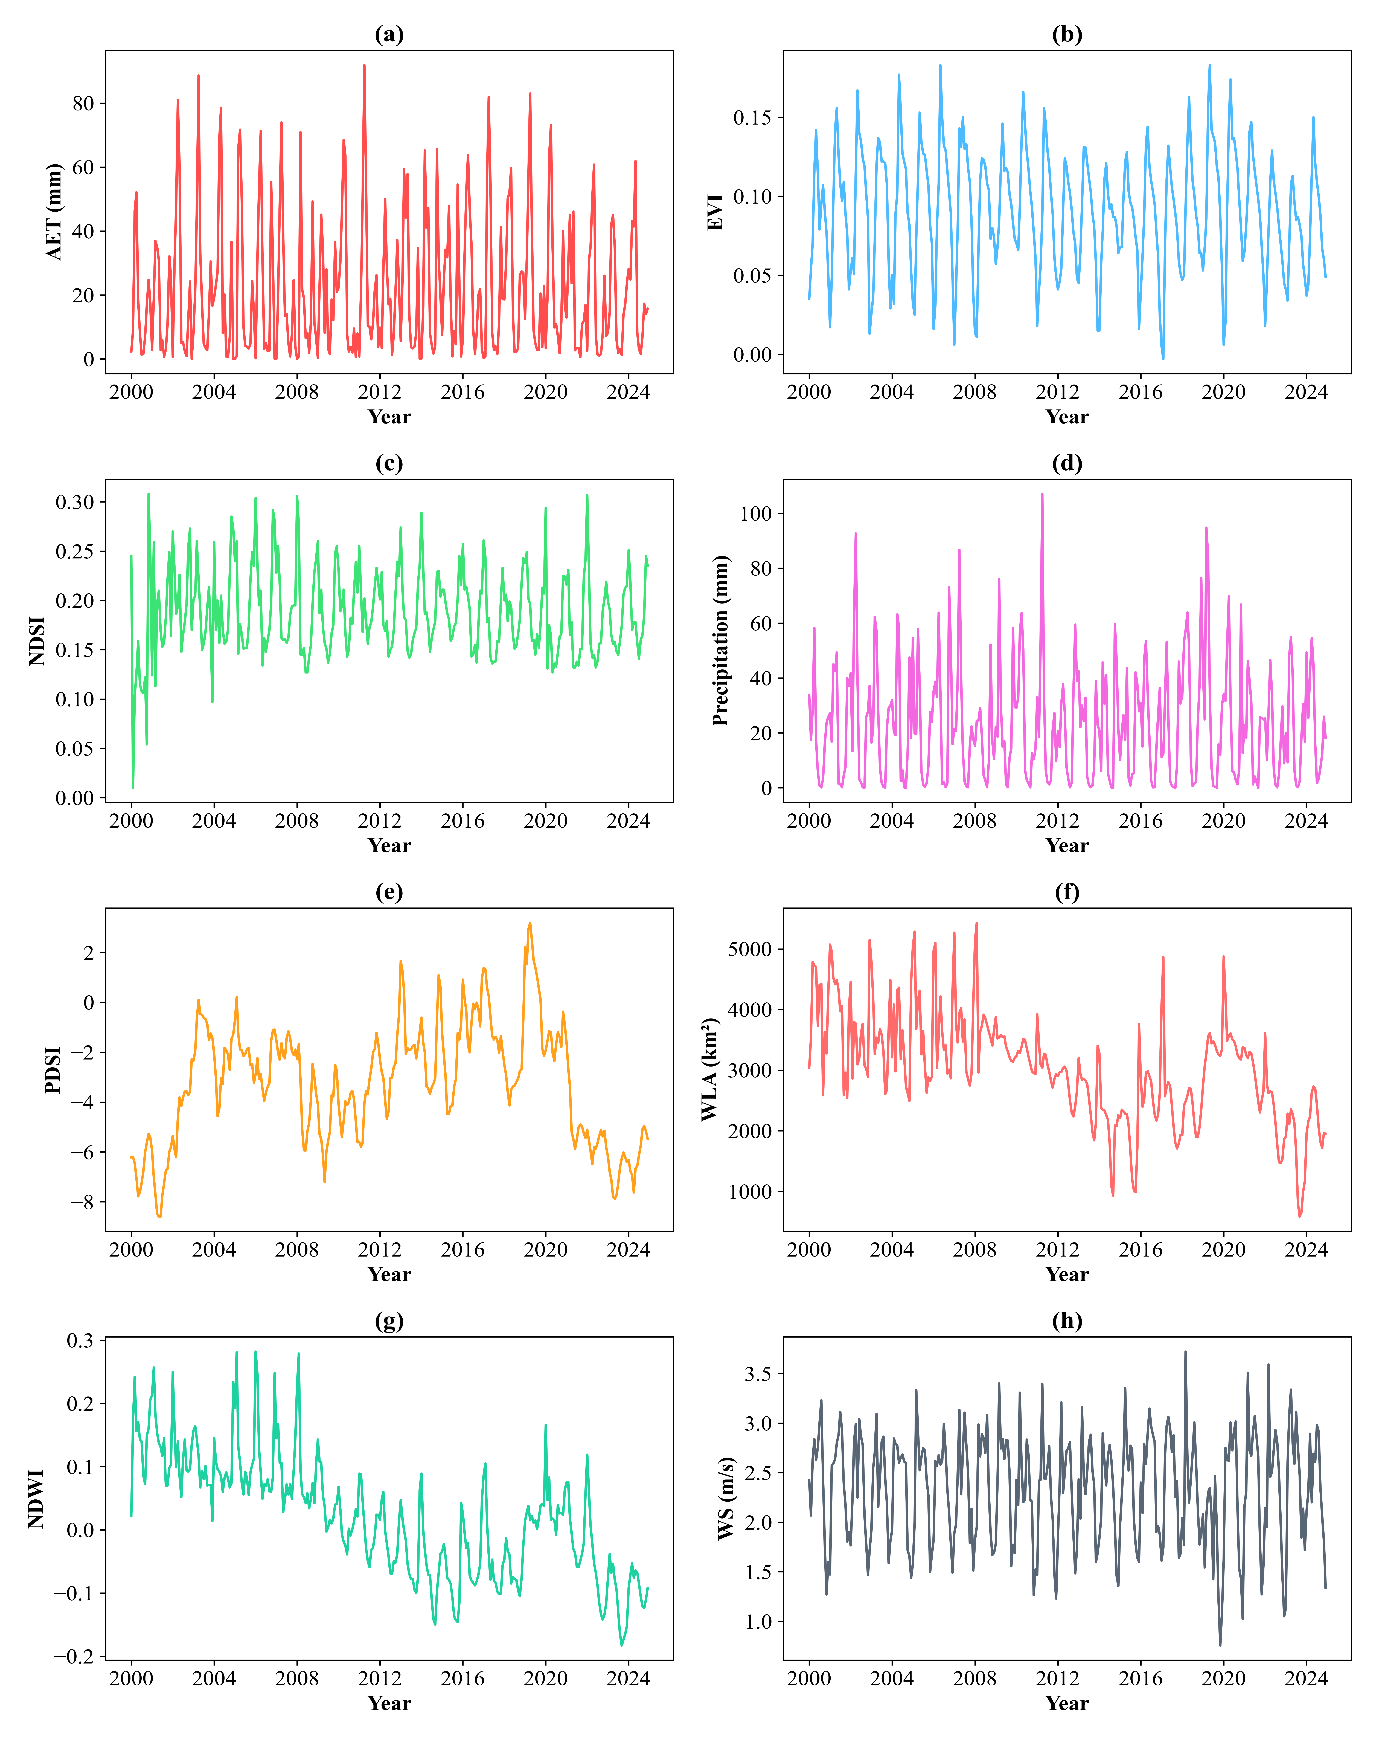


**Fig.S3. Monthly changes in AET (actual evapotranspiration), EVI (Enhanced vegetation index), NDSI (Normalized difference salinity index), precipitation (Pre), Palmer drought severity index (PDSI), WLA (wetland lake area), NDWI (Normalized difference water index), WS (wind speed) in Urmia Lake, Iran.**

**
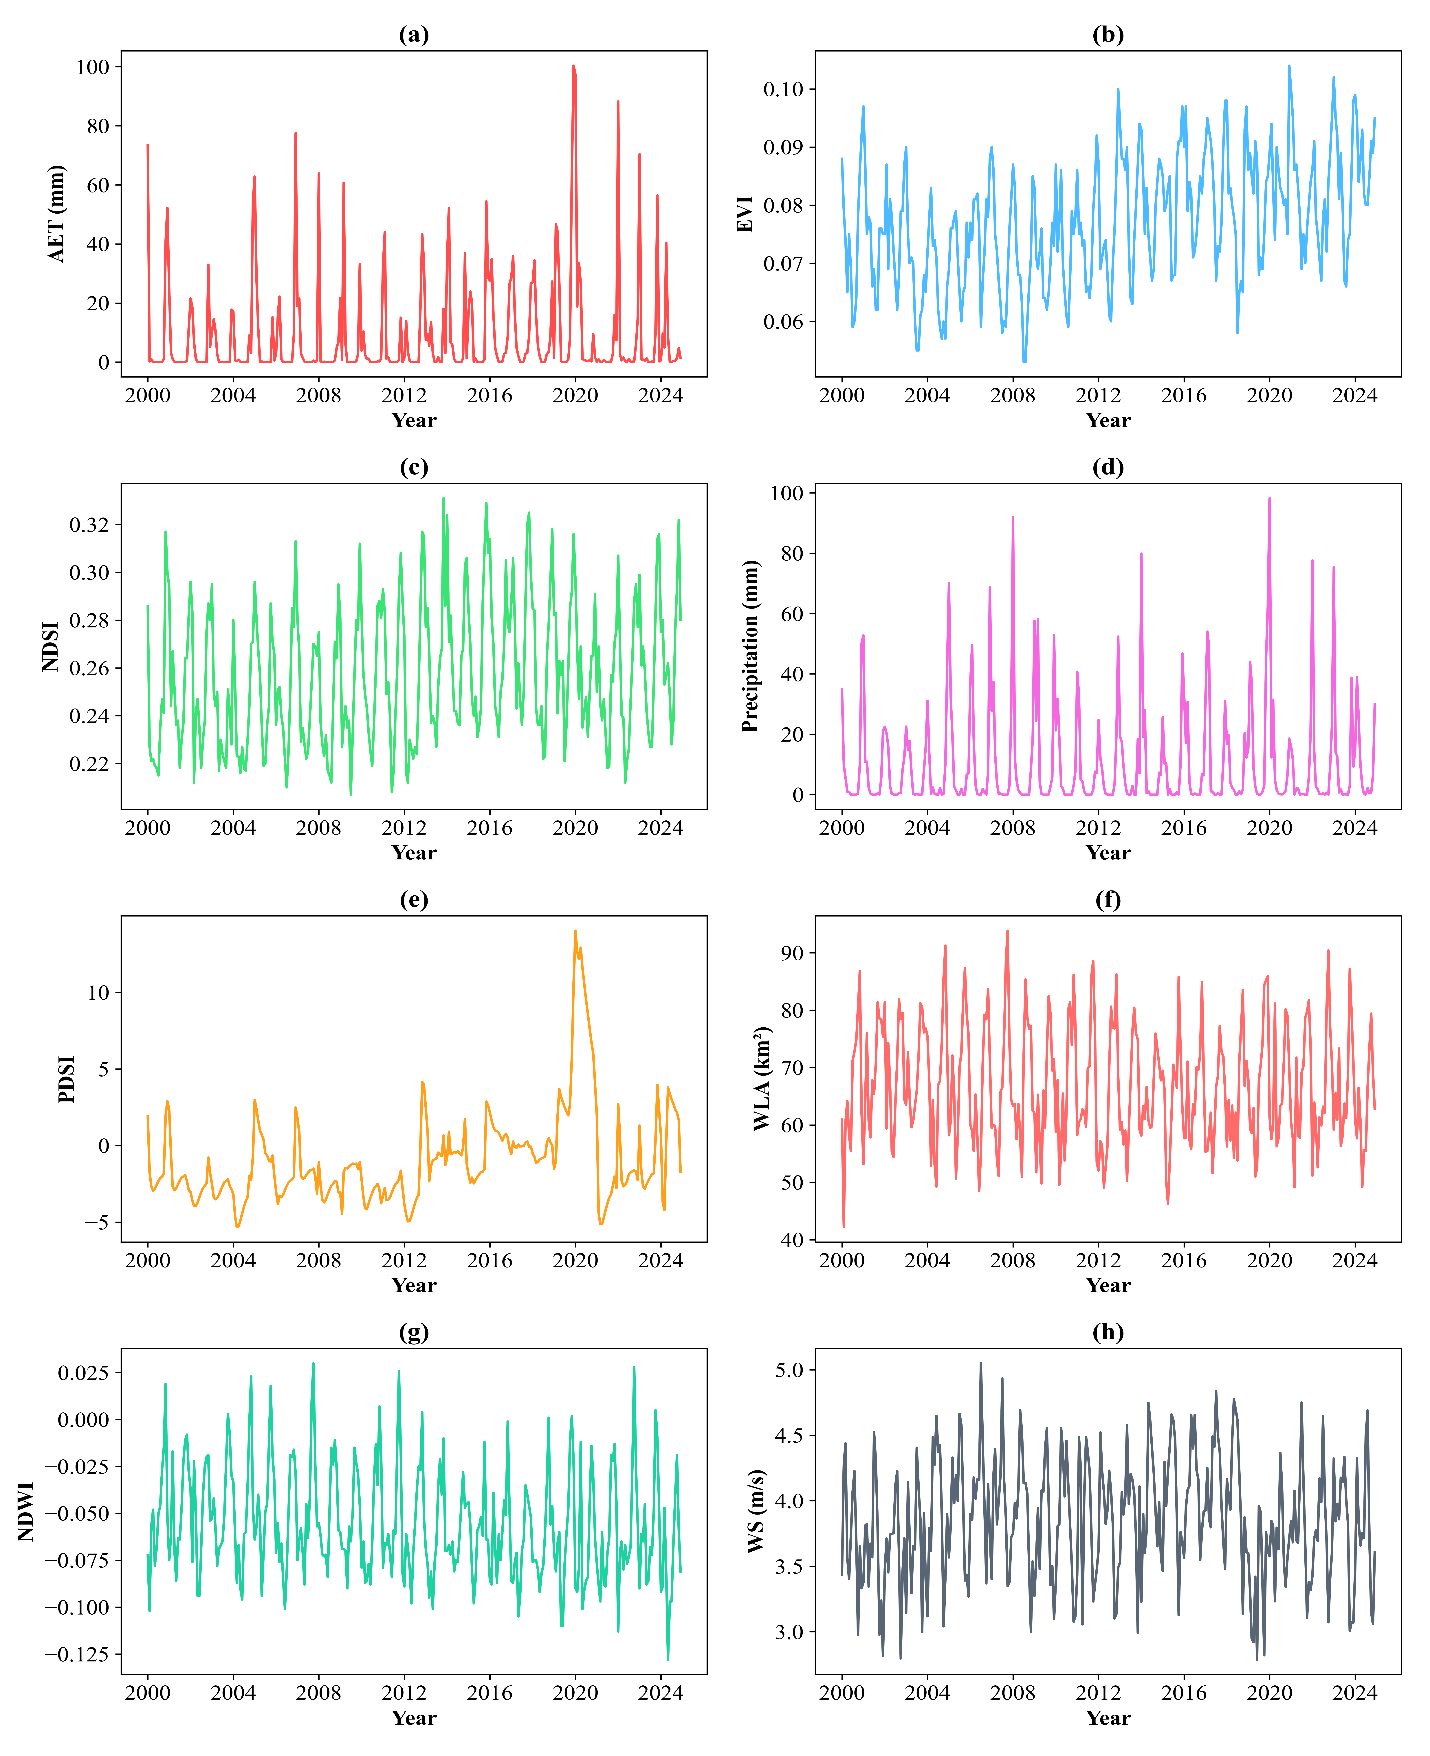
**

**Fig.S4. Monthly changes in AET (actual evapotranspiration), EVI (Enhanced vegetation index), NDSI (Normalized difference salinity index), precipitation (Pre), Palmer drought severity index (PDSI), WLA (wetland lake area), NDWI (Normalized difference water index), WS (wind speed) in Sheedvar wetland, Iran.**

**
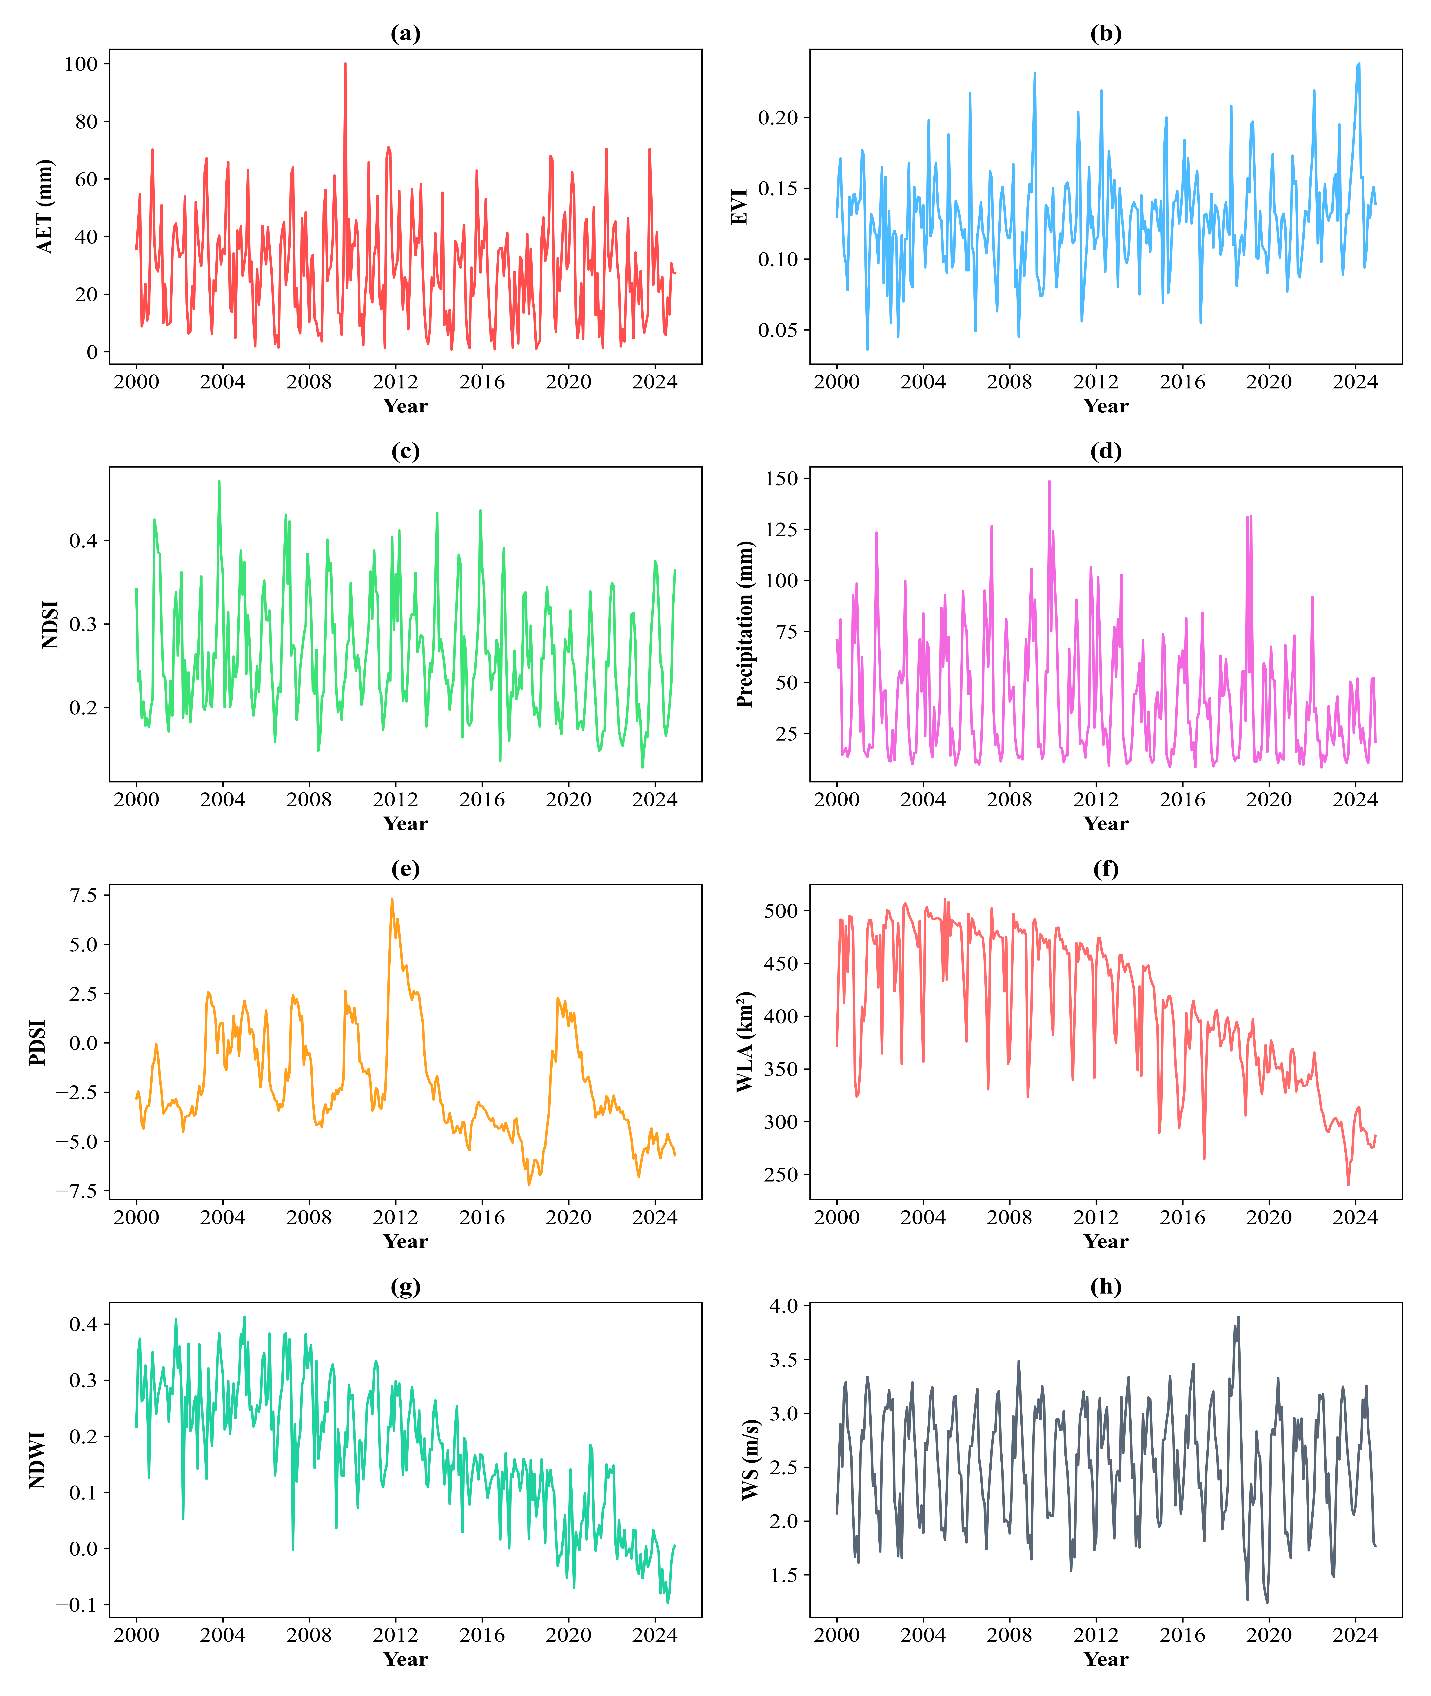
**

**Fig.S5. Monthly changes in AET (actual evapotranspiration), EVI (Enhanced vegetation index), NDSI (Normalized difference salinity index), precipitation (Pre), Palmer drought severity index (PDSI), WLA (wetland lake area), NDWI (Normalized difference water index), WS (wind speed) in Miankaleh wetland, Iran.**
